# Supplementary material for: The Effect of Electronic-Cigarette Vaping on Cardiac Function and Angiogenesis in Mice
Source: PubMed Central journal article supplement (PMC6411855; doi:10.1038/s41598-019-40847-5), 2019-03-11

## **The Effect of Electronic-Cigarette Vaping on Cardiac Function and Angiogenesis in Mice**

Huilin Shi<sup>1\*</sup>, Xiaoming Fan<sup>1\*</sup>, Austin Horton<sup>2</sup>, Steven T. Haller<sup>1</sup>, David J. Kennedy<sup>1</sup>, Isaac T. Schiefer<sup>2</sup>, Lance Dworkin<sup>1</sup>, Christopher J. Cooper<sup>1</sup>, Jiang Tian<sup>1&</sup>

<sup>1</sup>Department of Medicine, University of Toledo College of Medicine, Toledo, OH 43614

<sup>2</sup>Department of Medicinal and Biological Chemistry, College of Pharmacy and Pharmaceutical Sciences, University of Toledo, Toledo, OH 43614

\* These authors contribute equally to the manuscript.

Short Title: E-cigarette Vaping and Angiogenesis

& To whom correspondence should be addressed:

Jiang Tian, Ph.D.

Associate Professor

Department of Medicine

University of Toledo

3000 Arlington Avenue

Toledo, OH

Tel.: (419) 383-3510

E-mail: [Jiang.Tian@utoledo.edu](mailto:Jiang.Tian@utoledo.edu)

Supp\_Fig. 5A

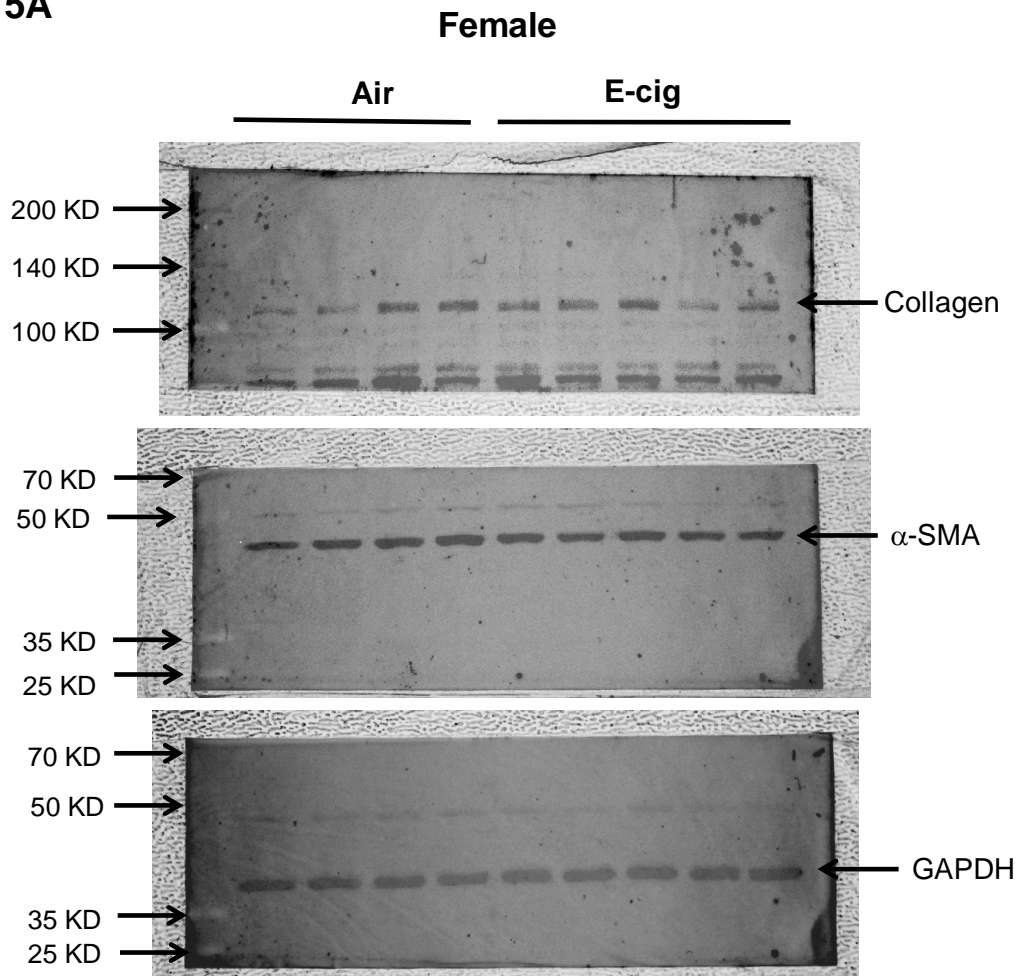

Supp\_Fig. 5B

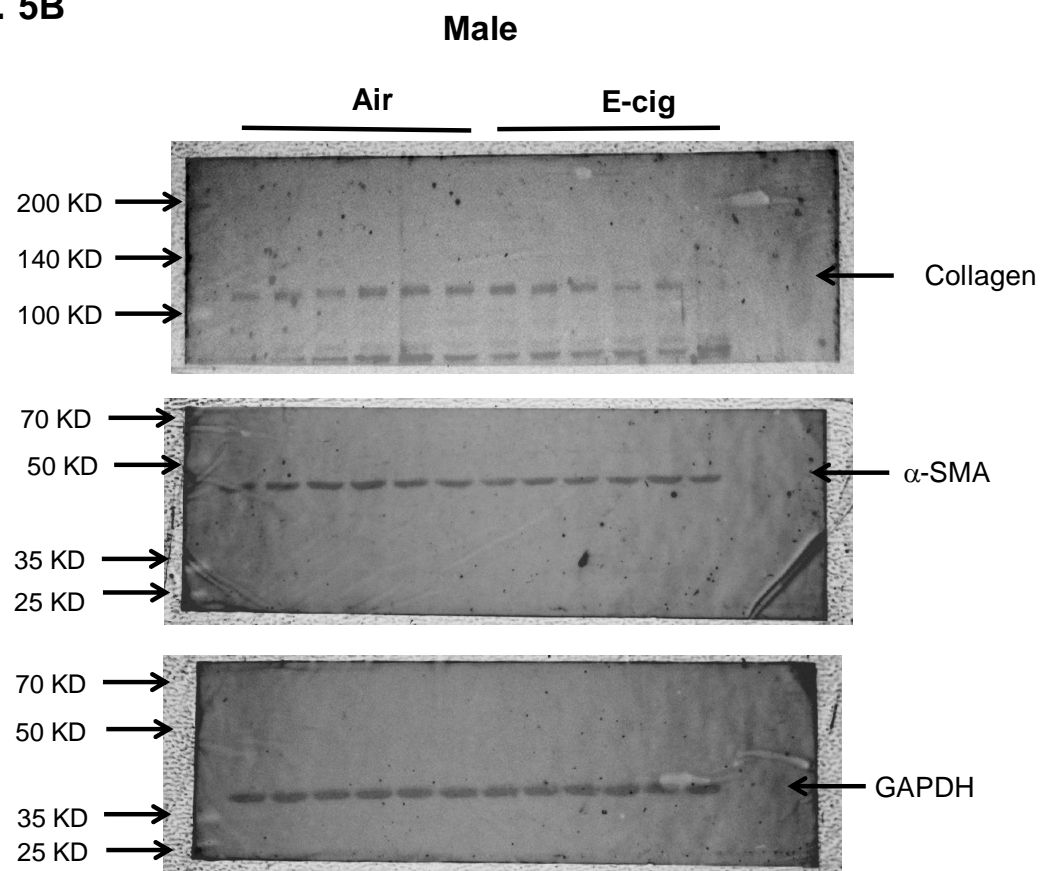

Supp\_Fig. 9

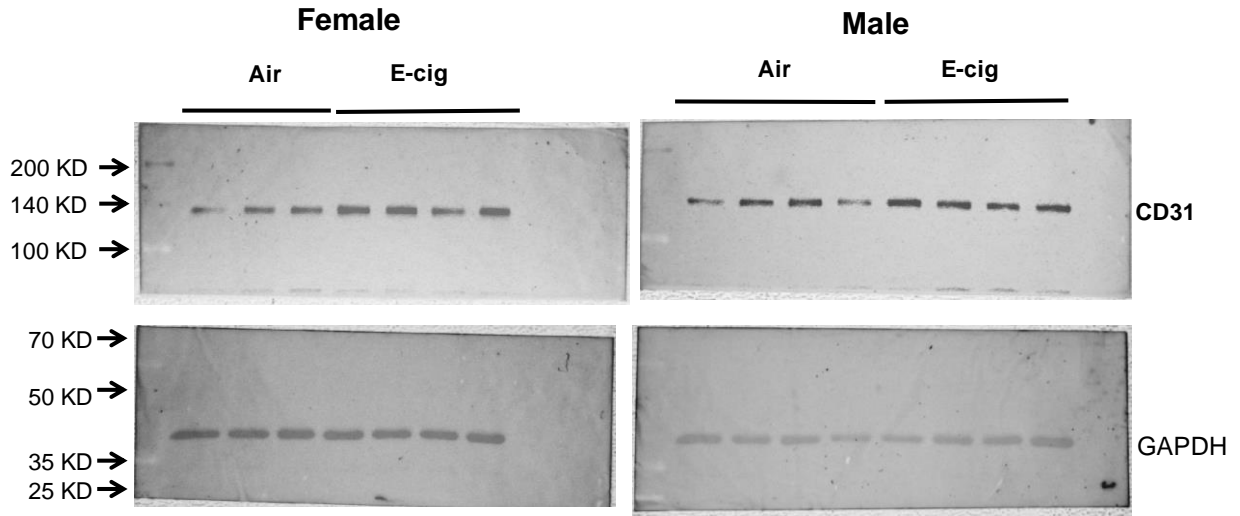

Supplement: 41598_2019_40847_MOESM1_ESM.pdf [file 41598_2019_40847_MOESM1_ESM.pdf]
